# Supplementary material for: Aspirin associated with risk reduction of secondary primary cancer for patients with head and neck cancer: A population-based analysis
Source: PubMed Central journal article supplement (PMC6104934; doi:10.1371/journal.pone.0199014), 2018-08-22
Supplement: pone.0199014.s001.pdf [file pone.0199014.s001.pdf]

**S1 Table** The distribution of secondary primary cancer in aspirin users and non-aspirin users among HNSCC patients identified during 2000–2011

|                                                      | All |        | Aspirin user |        | Non-aspirin user |        | p     |
|------------------------------------------------------|-----|--------|--------------|--------|------------------|--------|-------|
|                                                      | N   | (%)    | N            | %      | N                | %      |       |
| Overall                                              | 808 | 100.00 | 203          | 100.00 | 605              | 100.00 |       |
| Brain cancer (191)                                   | 3   | 0.37   | 0            | 0.00   | 3                | 0.50   | 0.58  |
| Head and neck cancer (140-149)                       | 30  | 3.71   | 9            | 4.43   | 21               | 3.47   | 0.53  |
| Thyroid gland cancer (193)                           | 7   | 0.87   | 2            | 0.99   | 5                | 0.83   | 1.00  |
| Esophagus cancer (150)                               | 195 | 24.13  | 33           | 16.26  | 162              | 26.78  | 0.002 |
| Stomach cancer (151)                                 | 29  | 3.59   | 4            | 1.97   | 25               | 4.13   | 0.19  |
| Colorectal cancer (153, and 154)                     | 62  | 7.67   | 16           | 7.88   | 46               | 7.60   | 0.90  |
| Liver cancer (155)                                   | 110 | 13.61  | 28           | 13.79  | 82               | 13.55  | 0.93  |
| Gallbladder and extra hepatic bile ducts (156)       | 6   | 0.74   | 2            | 0.99   | 4                | 0.66   | 0.64  |
| Pancreas cancer (157)                                | 10  | 1.24   | 5            | 2.46   | 5                | 0.83   | 0.13  |
| Lung cancer (162)                                    | 155 | 19.18  | 37           | 18.23  | 118              | 19.50  | 0.69  |
| Kidney cancer (189)                                  | 13  | 1.61   | 3            | 1.48   | 10               | 1.65   | 1.00  |
| Bladder cancer (188)                                 | 15  | 1.86   | 6            | 2.96   | 9                | 1.49   | 0.18  |
| Uterus and corpus cancer (women only) (179, and 182) | 2   | 0.25   | 1            | 0.49   | 1                | 0.17   | 0.44  |
| Cervical cancer (women only) (180)                   | 2   | 0.25   | 1            | 0.49   | 1                | 0.17   | 0.44  |
| Ovary cancer (women only) (183)                      | 1   | 0.12   | 0            | 0.00   | 1                | 0.17   | 1.00  |
| Prostate cancer (men only) (185)                     | 14  | 1.73   | 5            | 2.46   | 9                | 1.49   | 0.36  |
| Breast cancer (women only) (174)                     | 12  | 1.49   | 6            | 2.96   | 6                | 0.99   | 0.045 |
| Melanoma (172)                                       | 2   | 0.25   | 0            | 0.00   | 2                | 0.33   | 1.00  |
| Skin cancer (173)                                    | 11  | 1.36   | 6            | 2.96   | 5                | 0.83   | 0.02  |
| Non-Hodgkin's lymphoma (202)                         | 16  | 1.98   | 2            | 0.99   | 14               | 2.31   | 0.38  |
| Myeloma (203)                                        | 0   | 0.00   | 0            | 0.00   | 0                | 0.00   |       |
| Leukemia (204-208)                                   | 9   | 1.11   | 5            | 2.46   | 4                | 0.66   | 0.049 |
